# Erratum

Hardikar PS, Joshi SM, Bhat DS, Raut DA, Katre PA, Lubree HG, Jere A, Pandit AN, Fall CHD, Yajnik CS. Spuriously high prevalence of prediabetes diagnosed by HbA<sub>1c</sub> in young Indians partly explained by hematological factors and iron deficiency anemia. *Diabetes Care* 2012;35:797–802

In the print version of the article listed above, in the RESULTS section, the sentence “However, prediabetic and diabetic participants had higher BMI; mean corpuscular hemoglobin (MCH), and MCH concentration (MCHC); and higher erythrocyte distribution width (RDW) compared with those who were normoglycemic ( $P < 0.05$  for all)” should read as follows: “However, prediabetic and diabetic participants had higher BMI, lower mean corpuscular hemoglobin (MCH) and mean corpuscular hemoglobin concentration (MCHC), and higher erythrocyte distribution width (RDW) compared with those who were normoglycemic ( $P < 0.05$  for all).” In addition, several errors occurred in Table 3. The results and conclusions of the article remain unchanged. The corrected Table 3 appears below. The online version reflects these changes.

**Table 3—Characteristics of participants with normal glucose tolerance and hyperglycemia (prediabetes and diabetes) according to ADA HbA<sub>1c</sub> criteria**

|                                    | Normoglycemic (HbA <sub>1c</sub> <5.7%) | Prediabetes and diabetes (HbA <sub>1c</sub> ≥5.7%) |
|------------------------------------|-----------------------------------------|----------------------------------------------------|
| <i>n</i>                           | 86                                      | 30                                                 |
| Demographic                        |                                         |                                                    |
| Age (years)                        | 21.6 ± 0.4                              | 21.6 ± 0.4                                         |
| Boys                               | 52 (60.5)                               | 13 (43.3)                                          |
| Height (cm)                        | 167.3 ± 9.4                             | 164.5 ± 9.3                                        |
| Weight (kg)                        | 60.5 ± 12.5                             | 64.9 ± 14.5                                        |
| BMI (kg/m <sup>2</sup> )           | 21.5 ± 3.6                              | 23.9 ± 4.8**                                       |
| OGTT                               |                                         |                                                    |
| Fasting glucose (mg/dL)            | 91.7 ± 6.8                              | 97.0 ± 10.7**                                      |
| 2-h glucose (mg/dL)                | 100.0 ± 22.2                            | 128.8 ± 45.4***                                    |
| Impaired fasting glucose           | 0 (0)                                   | 0 (0)                                              |
| Impaired glucose tolerance         | 6 (7)                                   | 3 (10)                                             |
| Diabetes                           | 0 (0)                                   | 3 (10)                                             |
| HbA <sub>1c</sub> (%)              | 5.2 (0.2)                               | 5.9 (0.2)***                                       |
| Hematological                      |                                         |                                                    |
| Hemoglobin (g/dL)                  | 13.2 ± 1.8                              | 12.1 ± 2.3*                                        |
| Anemic                             | 25 (29.1)                               | 14 (46.7)                                          |
| MCV (fL)                           | 88.6 ± 8.3                              | 85.1 ± 10.3                                        |
| RDW (%)                            | 14.7 ± 1.9                              | 15.7 ± 2.1*                                        |
| MCH (pg)                           | 28.3 ± 3.1                              | 26.6 ± 3.9*                                        |
| MCHC (pg)                          | 32.0 ± 1.4                              | 31.1 ± 1.5*                                        |
| Platelets (10 <sup>3</sup> /μL)    | 303.5 ± 75.2                            | 332.8 ± 88.1                                       |
| Erythrocytes (10 <sup>6</sup> /μL) | 4.6 ± 0.5                               | 4.5 ± 0.4                                          |
| WBCs (10 <sup>3</sup> /μL)         | 7.3 ± 1.6                               | 7.5 ± 2.0                                          |
| Circulating nutrients              |                                         |                                                    |
| Plasma B <sub>12</sub> (pmol/L)†   | 175.0 (134.7–238.0)                     | 151.0 (117.2–198.2)                                |
| <150                               | 32 (37.2)                               | 14 (46.7)                                          |
| Plasma folate (nmol/L)†            | 9.4 (7.2–13.57)                         | 11.4 (6.8–17.8)                                    |
| <7                                 | 18 (20.9)                               | 8 (26.7)                                           |
| Plasma ferritin (ng/mL)†           | 27.1 (8.0–52.8)                         | 21.0 (4.6–65.3)                                    |
| <15                                | 30 (34.9)                               | 13 (43.3)                                          |
| Creatinine (mg%)                   | 0.7 ± 0.1                               | 0.7 ± 0.1                                          |
| eGFR (mL/min)†                     | 129.2 (112.0–151.0)                     | 132.4 (112.1–156.7)                                |

Data are mean ± SD or *n* (%) unless otherwise indicated. †Data are 50th (25th–75th) centiles. *P* values refer to significance of the difference between groups calculated by ANOVA or Mann-Whitney *U* test. \* $P < 0.05$ . \*\* $P < 0.01$ . \*\*\* $P < 0.001$ .
